# Supplementary material
Source: PubMed Central journal article supplement (PMC3296825)
Supplement: NIHMS341768-supplement-1.pdf [file NIHMS341768-supplement-1.pdf]

# Activation of fast skeletal muscle troponin as a potential therapeutic approach for treating neuromuscular diseases

Alan J Russell<sup>1</sup>, James J Hartman<sup>1</sup>, Aaron C Hinken<sup>1</sup>, Alexander R Muci<sup>1</sup>, Raja Kawas<sup>1</sup>, Lena Driscoll<sup>1</sup>, Guillermo Godinez<sup>1</sup>, Kenneth H Lee<sup>1</sup>, David Marquez<sup>1</sup>, William F Browne IV<sup>1</sup>, Michael M Chen<sup>2</sup>, David Clarke<sup>1</sup>, Scott E Collibee<sup>1</sup>, Marc Garard<sup>1</sup>, Richard Hansen<sup>1</sup>, Zhiheng Jia<sup>1</sup>, Pu-Ping Lu<sup>1</sup>, Hector Rodriguez<sup>1</sup>, Khalil G Saikali<sup>2</sup>, Julia Schaletzky<sup>1</sup>, Vipin Vijayakumar<sup>1</sup>, Daniel L Albertus<sup>3</sup>, Dennis R Claflin<sup>3</sup>, David J Morgans<sup>1</sup>, Bradley P Morgan<sup>1</sup>, Fady I Malik<sup>1\*</sup>

## Affiliations:

<sup>1</sup> Preclinical Research and Development and <sup>2</sup> Biometrics, Cytokinetics, Inc., South San Francisco, CA, 94080, USA. <sup>3</sup> Department of Surgery, Section of Plastic Surgery and the Department of Biomedical Engineering, University of Michigan, Ann Arbor, MI, 48109 USA.

**\*To whom correspondence should be addressed:**

E-mail: fmalik@cytokinetics.com

## Supplementary Fig. 1

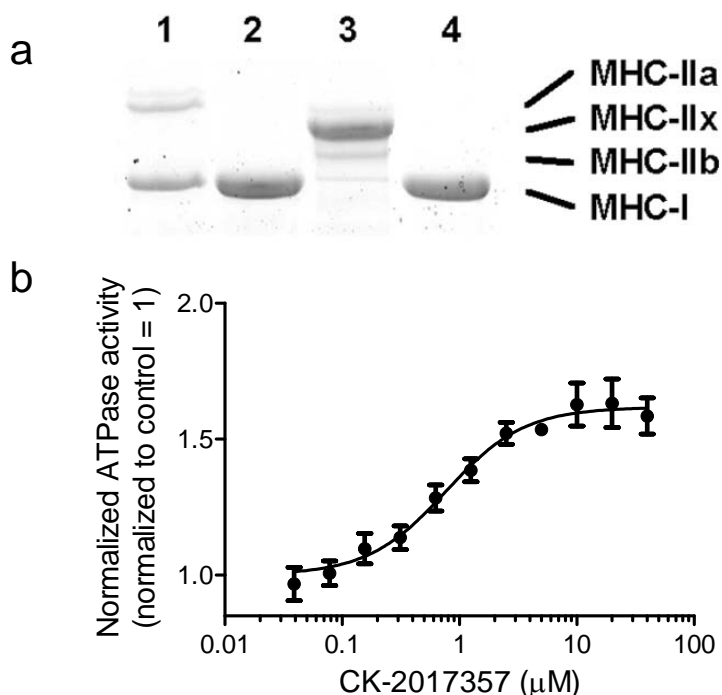

**Characterization of myofibrils.** (a) Glycerol SDS-PAGE analysis of myosin isoforms present in myofibrils prepared from different muscles. Lane 1-4: rat diaphragm muscle (myosin isoform loading control), bovine slow skeletal muscle, rabbit fast skeletal muscle, and bovine cardiac muscle. (b) Calcium-dependent ATPase activity (mean  $\pm$  SD) with CK-2017357 in bovine fast skeletal muscle myofibrils at fixed pCa (~25% of full activation, pCa<sub>25</sub>).

## Supplementary Fig. 2

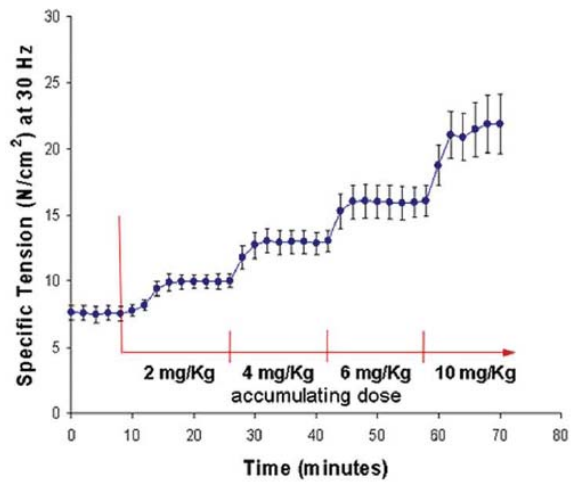

**Time course of force response following CK-2017357 administration.** Force changes in rat EDL muscle *in situ* after four sequential intra-aortic infusions of CK-2017357 (mean  $\pm$  SEM,  $n = 5$ ).
